# Supplementary material for: Effects of Light and Oxygen on Chlorophyll d Biosynthesis in a Marine Cyanobacterium Acaryochloris marina
Source: MDPI journal article supplement (doi:10.3390/plants11070915), 2022-03-29
Supplement: s1 [file s1]

# Effects of light and oxygen on chlorophyll *d* biosynthesis in a marine cyanobacterium *Acaryochloris marina*

Yuki Tsuzuki <sup>1</sup>, Yusuke Tsukatani <sup>2</sup>, Hisanori Yamakawa <sup>1</sup>, Shigeru Itoh <sup>3</sup>, Yuichi Fujita <sup>1</sup>, and Haruki Yamamoto <sup>1,\*</sup>

<sup>1</sup> Graduate School of Bioagricultural Sciences, Nagoya University; duffko0614@gmail.com

(Yuki T.); yamakawa008@gmail.com (Hisanori Y.); fujita@agr.nagoya-u.ac.jp (Y. F.)

<sup>2</sup> Japan Agency for Marine-Earth Science and Technology (JAMSTEC);

tsukatani@jamstec.go.jp (Yusuke T.)

<sup>3</sup> Graduate School of Science, Nagoya University; itoh@bio.phys.nagoya-u.ac.jp (S. I.)

\* Correspondence: haruki@agr.nagoya-u.ac.jp; Tel.: +81-52-789-4090

## Supplemental information

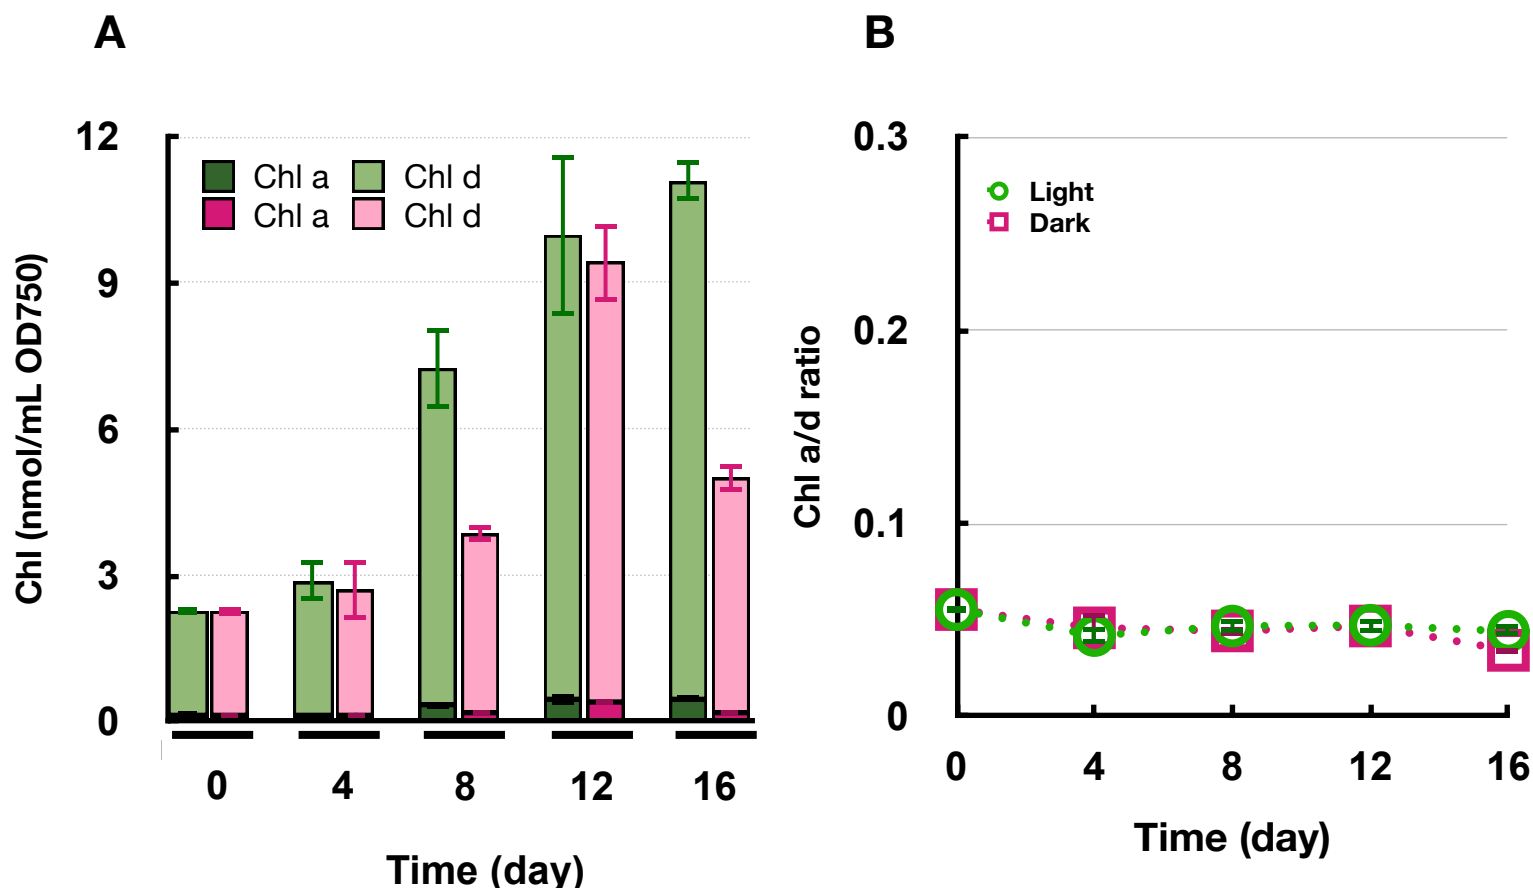

**Figure S1. Chl *a/d* content in the dark-grown cultures of *A. sp. MBIC10699***

(A) The amounts of Chl *a* (dark green/dark pink) and Chl *d* (green/pink) were measured on days 0, 4, 8, 12, and 16 of *A. sp. MBIC10699* cells in photo-autotrophic (green) and dark-heterotrophic (pink) conditions, respectively. (B) The ratio of cellular Chl *a/d* amount in photo-autotrophic conditions (green circle) and dark-heterotrophic conditions (pink square).

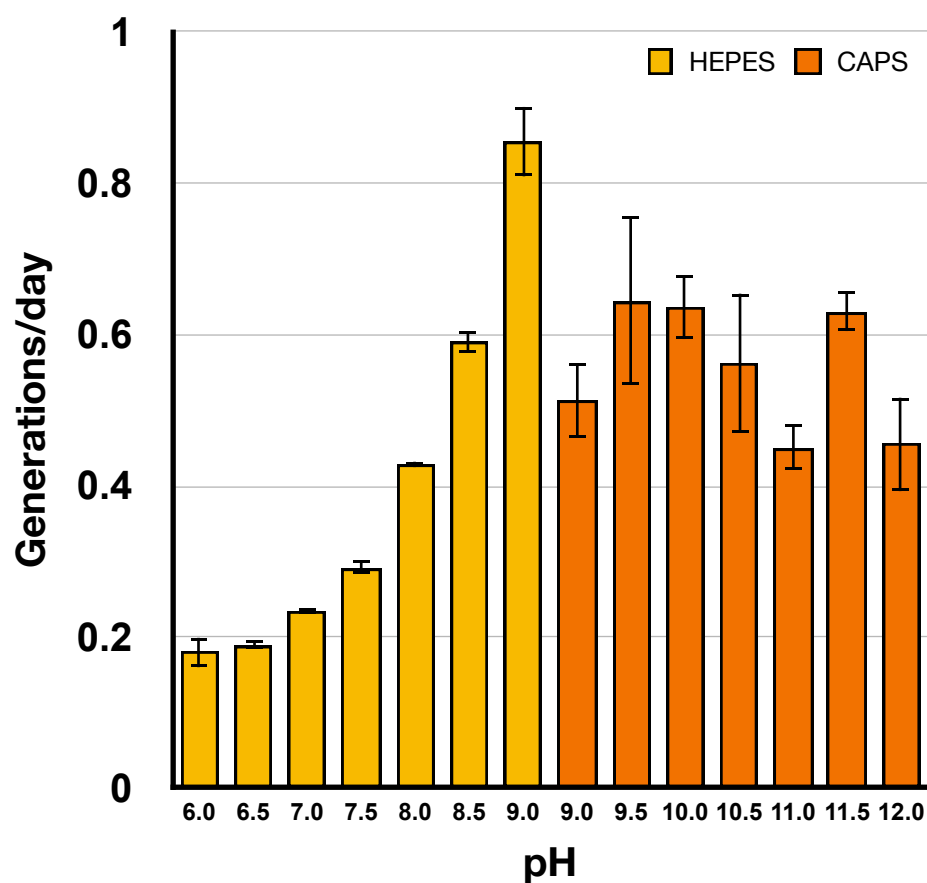

**Figure S2. Comparison of growth in *A. marina* under various pH conditions**

*A. marina* was cultured under various pH conditions, and the number of generations/day was calculated from the growth rate of the exponential phase. To adjust pH in IMK medium, HEPES (yellow) and CAPS (orange) buffer were used.
